# Supplementary material for: Constructing a meaningful evolutionary average at the phylogenetic center of mass
Source: PubMed Central journal article supplement (PMC1919398; doi:10.1186/1471-2105-8-222), 2007-06-26
Supplement: 1471-2105-8-222-S1.pdf [file 1471-2105-8-222-S1.pdf]

# a Covariance matrix $\Sigma$ under ACL

|      | PV22 | BH10 | BRU | HXB | SF2 | CDC | WMJ2 | RF  | ELI  | MAL  | Z3  |
|------|------|------|-----|-----|-----|-----|------|-----|------|------|-----|
| PV22 | 9.2  | 8.9  | 8.8 | 8.7 | 6.3 | 6.2 | 5.7  | 5.3 | 2.7  | 2.7  | 0.0 |
| BH10 | 8.9  | 9.2  | 8.8 | 8.7 | 6.3 | 6.2 | 5.7  | 5.3 | 2.7  | 2.7  | 0.0 |
| BRU  | 8.8  | 8.8  | 9.3 | 8.7 | 6.3 | 6.2 | 5.7  | 5.3 | 2.7  | 2.7  | 0.0 |
| HXB  | 8.7  | 8.7  | 8.7 | 9.4 | 6.3 | 6.2 | 5.7  | 5.3 | 2.7  | 2.7  | 0.0 |
| SF2  | 6.3  | 6.3  | 6.3 | 6.3 | 9.6 | 6.2 | 5.7  | 5.3 | 2.7  | 2.7  | 0.0 |
| CDC  | 6.2  | 6.2  | 6.2 | 6.2 | 6.2 | 9.9 | 5.7  | 5.3 | 2.7  | 2.7  | 0.0 |
| WMJ2 | 5.7  | 5.7  | 5.7 | 5.7 | 5.7 | 5.7 | 8.7  | 5.3 | 2.7  | 2.7  | 0.0 |
| RF   | 5.3  | 5.3  | 5.3 | 5.3 | 5.3 | 5.3 | 5.3  | 9.6 | 2.7  | 2.7  | 0.0 |
| ELI  | 2.7  | 2.7  | 2.7 | 2.7 | 2.7 | 2.7 | 2.7  | 2.7 | 10.9 | 4.6  | 0.0 |
| MAL  | 2.7  | 2.7  | 2.7 | 2.7 | 2.7 | 2.7 | 2.7  | 2.7 | 4.6  | 10.7 | 0.0 |
| Z3   | 0.0  | 0.0  | 0.0 | 0.0 | 0.0 | 0.0 | 0.0  | 0.0 | 0.0  | 0.0  | 9.3 |

# b Effective covariance matrix under BM

|      | PV22 | BH10 | BRU | HXB | SF2 | CDC | WMJ2 | RF  | ELI  | MAL  | Z3   |
|------|------|------|-----|-----|-----|-----|------|-----|------|------|------|
| PV22 | 8.3  | 8.0  | 7.9 | 7.8 | 5.4 | 5.3 | 5.0  | 4.6 | 2.4  | 2.4  | 1.9  |
| BH10 | 8.0  | 8.3  | 7.9 | 7.8 | 5.4 | 5.3 | 5.0  | 4.6 | 2.4  | 2.4  | 1.9  |
| BRU  | 7.9  | 7.9  | 8.4 | 7.8 | 5.4 | 5.3 | 5.0  | 4.6 | 2.4  | 2.4  | 1.9  |
| HXB  | 7.8  | 7.8  | 7.8 | 8.5 | 5.4 | 5.3 | 5.0  | 4.6 | 2.4  | 2.4  | 1.9  |
| SF2  | 5.4  | 5.4  | 5.4 | 5.4 | 8.8 | 5.4 | 5.0  | 4.7 | 2.5  | 2.5  | 1.9  |
| CDC  | 5.3  | 5.3  | 5.3 | 5.3 | 5.4 | 9.1 | 5.0  | 4.7 | 2.4  | 2.5  | 1.9  |
| WMJ2 | 5.0  | 5.0  | 5.0 | 5.0 | 5.0 | 5.0 | 8.2  | 4.8 | 2.6  | 2.6  | 2.1  |
| RF   | 4.6  | 4.6  | 4.6 | 4.6 | 4.7 | 4.7 | 4.8  | 9.2 | 2.6  | 2.7  | 2.1  |
| ELI  | 2.4  | 2.4  | 2.4 | 2.4 | 2.5 | 2.4 | 2.6  | 2.6 | 11.2 | 5.0  | 2.5  |
| MAL  | 2.4  | 2.4  | 2.4 | 2.4 | 2.5 | 2.5 | 2.6  | 2.7 | 5.0  | 11.1 | 2.5  |
| Z3   | 1.9  | 1.9  | 1.9 | 1.9 | 1.9 | 1.9 | 2.1  | 2.1 | 2.5  | 2.5  | 13.9 |
