# Supplementary material for: Constructing a meaningful evolutionary average at the phylogenetic center of mass
Source: PubMed Central journal article supplement (PMC1919398; doi:10.1186/1471-2105-8-222), 2007-06-26
Supplement: 1471-2105-8-222-S2.pdf [file 1471-2105-8-222-S2.pdf]

|   | Hydrophobicity | Accessibility | Flexibility | Beta-Turn |
|---|----------------|---------------|-------------|-----------|
| A | 0.77           | 0.61          | -0.82       | -0.46     |
| C | 1.00           | -1.56         | -0.95       | -0.36     |
| D | -1.01          | 1.03          | 1.01        | 1.15      |
| E | -1.01          | 0.27          | 0.88        | 0.10      |
| F | 1.10           | -0.99         | -1.43       | -0.91     |
| G | 0.03           | 0.65          | 1.37        | 1.72      |
| H | -0.91          | -0.95         | -1.31       | -0.68     |
| I | 1.67           | -0.84         | 0.40        | -1.11     |
| K | -1.14          | 2.01          | 0.52        | 0.02      |
| L | 1.44           | -0.08         | -0.70       | -0.93     |
| M | 0.80           | -1.52         | -1.56       | -1.36     |
| N | -1.01          | 0.65          | 0.40        | 0.82      |
| P | -0.37          | -0.08         | 1.01        | 2.40      |
| Q | -1.01          | 0.08          | 0.76        | 0.07      |
| R | -1.34          | -0.19         | 1.25        | -0.18     |
| S | -0.10          | 1.67          | 1.01        | 0.92      |
| T | -0.07          | 0.76          | 0.15        | 0.22      |
| V | 1.57           | -0.19         | -0.46       | -1.21     |
| W | -0.14          | -1.37         | -1.43       | -0.48     |
| Y | -0.27          | 0.04          | -0.09       | 0.25      |
